# Supplementary material for: [ASr4Cl][Ge3S10] (A = Na, K) and [KBa4Cl][Ge3S10]: new salt-inclusion infrared nonlinear optical crystals with zero-dimensional [Ge3S9] clusters
Source: Royal Society of Chemistry journal article supplement (doi:10.1039/d2qi01689c), 2022-01-01
Supplement: d2qi01689c1.pdf [file d2qi01689c1.pdf]

# [ASr<sub>4</sub>Cl][Ge<sub>3</sub>S<sub>10</sub>] (A=Na, K) and [KBa<sub>4</sub>Cl][Ge<sub>3</sub>S<sub>10</sub>]: New salt-inclusion infrared nonlinear optical crystals with zero-dimensional [Ge<sub>3</sub>S<sub>9</sub>] clusters

Yufei Song,<sup>a</sup> Shaoxin Cui,<sup>a</sup> Zhen Qian,<sup>a</sup> Hongwei Yu,<sup>a</sup> Zhanggui Hu,<sup>a</sup> Jiyang Wang,<sup>a</sup>  
Yicheng Wu<sup>a</sup> and Hongping Wu\*<sup>a</sup>

Correspondence: Hongping Wu ([wuhp@ms.xjb.ac.cn](mailto:wuhp@ms.xjb.ac.cn))

<sup>a</sup>Tianjin Key Laboratory of Functional Crystal Materials, Institute of Functional Crystal, Tianjin University of Technology, Tianjin 300384, China.

## CONTENTS

|                                                                                    |    |
|------------------------------------------------------------------------------------|----|
| 1. <i>Table S1. Crystal data</i> .....                                             | 2  |
| 2. <i>Table S2. Atomic coordinates, displacement parameters and BVSs</i> .....     | 3  |
| 3. <i>Table S3. Selected distances and angles</i> .....                            | 4  |
| 4. <i>Table S4. Dimensional distribution</i> .....                                 | 10 |
| 5. <i>Table S5. Magnitude of Dipole Moments</i> .....                              | 11 |
| 6. <i>Fig. S1. Experimental and calculated powder X-ray diffraction data</i> ..... | 12 |
| 7. <i>Fig. S2. EDS spectra</i> .....                                               | 13 |
| 8. <i>Fig. S3. IR spectra</i> .....                                                | 14 |
| 9. <i>Fig. S4. Coordination environment of cations</i> .....                       | 15 |
| 10. <i>Fig. S5. Raman spectra</i> .....                                            | 16 |
| 11. <i>Fig. S6. Experimented birefringence</i> .....                               | 17 |
| 12. <i>Fig. S7. Calculated birefringence</i> .....                                 | 18 |
| 13. <i>Fig. S8. Calculated band structure</i> .....                                | 19 |
| 14. <i>Fig. S9. Projected density of states</i> .....                              | 20 |
| 15. <i>References</i> .....                                                        | 21 |

**Table S1.** Crystal data and structure refinement for [NaSr<sub>4</sub>Cl][Ge<sub>3</sub>S<sub>10</sub>], [KSr<sub>4</sub>Cl][Ge<sub>3</sub>S<sub>10</sub>], and [KBa<sub>4</sub>Cl][Ge<sub>3</sub>S<sub>10</sub>].

| Empirical formula                                                                          | NaSr <sub>4</sub> ClGe <sub>3</sub> S <sub>10</sub> | KSr <sub>4</sub> ClGe <sub>3</sub> S <sub>10</sub> | KBa <sub>4</sub> ClGe <sub>3</sub> S <sub>10</sub> |
|--------------------------------------------------------------------------------------------|-----------------------------------------------------|----------------------------------------------------|----------------------------------------------------|
| Formula weight                                                                             | 947.29                                              | 963.40                                             | 1162.28                                            |
| Temperature (K)                                                                            |                                                     | 273(2)                                             |                                                    |
| Crystal system                                                                             |                                                     | Hexagonal                                          |                                                    |
| Space group                                                                                |                                                     | <i>P</i> 6 <sub>3</sub>                            |                                                    |
| <i>a</i> (Å)                                                                               | 9.578(4)                                            | 9.713(9)                                           | 9.922(6)                                           |
| <i>c</i> (Å)                                                                               | 11.830(6)                                           | 11.937(16)                                         | 12.205(13)                                         |
| Volume(Å <sup>3</sup> )                                                                    | 939.8(8)                                            | 975.5(2)                                           | 1040.7(17)                                         |
| <i>Z</i>                                                                                   |                                                     | 2                                                  |                                                    |
| <i>D</i> <sub>c</sub> (g cm <sup>-3</sup> )                                                | 3.347                                               | 3.280                                              | 3.709                                              |
| $\mu$ (mm <sup>-1</sup> )                                                                  | 17.246                                              | 16.810                                             | 13.027                                             |
| <i>F</i> (000)                                                                             | 872                                                 | 888                                                | 1032                                               |
| Completeness to theta                                                                      | 99.7%                                               | 100%                                               | 99.8%                                              |
| GOF on <i>F</i> <sup>2</sup>                                                               | 1.077                                               | 1.063                                              | 1.063                                              |
| <i>R</i> <sub>1</sub> , <i>wR</i> <sub>2</sub> ( <i>I</i> > 2σ( <i>I</i> )) <sup>[a]</sup> | 0.0468, 0.1166                                      | 0.0446, 0.1075                                     | 0.0479, 0.1268                                     |
| <i>R</i> <sub>1</sub> , <i>wR</i> <sub>2</sub> (all data)                                  | 0.0612, 0.1249                                      | 0.0700, 0.1195                                     | 0.0592, 0.1340                                     |
| Flack <i>x</i> parameter                                                                   | 0.207 (0.022)                                       | 0.247 (0.016)                                      | 0.186 (0.030)                                      |
| Largest diff. peak and hole (eÅ <sup>-3</sup> )                                            | 0.886 and -<br>1.544                                | 0.796 and -<br>1.339                               | 1.854 and -<br>1.436                               |

<sup>[a]</sup>  $R_1 = \sum ||F_o| - |F_c|| / \sum |F_o|$  and  $wR_2 = [\sum w(F_o^2 - F_c^2)^2 / \sum w F_o^4]^{1/2}$  for  $F_o^2 > 2s(F_o^2)$

**Table S2.** Atomic coordinates and equivalent isotropic atomic displacement parameters ( $\text{\AA}^2$ ), bond valence sums (BVSs) for  $[\text{NaSr}_4\text{Cl}][\text{Ge}_3\text{S}_{10}]$ ,  $[\text{KSr}_4\text{Cl}][\text{Ge}_3\text{S}_{10}]$ , and  $[\text{KBa}_4\text{Cl}][\text{Ge}_3\text{S}_{10}]$ .

**$\text{NaSr}_4\text{ClGe}_3\text{S}_{10}$**

| Atom | x/a       | y/b       | z/c         | U(eq)      | BVS  |
|------|-----------|-----------|-------------|------------|------|
| Na1  | 0         | 0         | 0.3943(18)  | 0.049(4)   | 0.93 |
| Sr1  | 0.33333   | 0.6667    | 0.3295(3)   | 0.0165(7)  | 2.37 |
| Sr2  | 0.0869(3) | 0.3401(3) | 0.6507(3)   | 0.0476(7)  | 1.87 |
| Ge1  | 0.4479(2) | 0.3356(2) | 0.49056(15) | 0.0160(5)  | 4.21 |
| S1   | 0.33333   | 0.6667    | 0.5869(8)   | 0.024(2)   | 2.09 |
| S2   | 0.4435(7) | 0.1128(6) | 0.4278(5)   | 0.0253(12) | 1.82 |
| S3   | 0.2510(6) | 0.3237(6) | 0.3907(5)   | 0.0220(11) | 2.09 |
| S4   | 0.4240(7) | 0.3484(8) | 0.6710(5)   | 0.0334(14) | 2.01 |
| Cl1  | 0         | 0         | 0.6400(9)   | 0.029(2)   | 1.20 |

**$\text{KSr}_4\text{ClGe}_3\text{S}_{10}$**

| Atom | x/a         | y/b         | z/c         | U(eq)      | BVS  |
|------|-------------|-------------|-------------|------------|------|
| K1   | 0           | 0           | 0.6018(6)   | 0.0403(16) | 1.07 |
| Sr1  | 0.666667    | 0.333333    | 0.67099(19) | 0.0195(5)  | 2.44 |
| Sr2  | 0.3449(2)   | 0.2558(2)   | 0.3447(2)   | 0.0504(6)  | 1.70 |
| Ge1  | 0.34283(17) | 0.88912(16) | 0.50620(11) | 0.0203(4)  | 4.20 |
| S1   | 0.3513(6)   | 0.9234(5)   | 0.3279(3)   | 0.0354(11) | 1.79 |
| S2   | 0.3390(5)   | 0.0754(5)   | 0.6044(4)   | 0.0383(11) | 2.07 |
| S3   | 0.1202(5)   | 0.6767(5)   | 0.5690(4)   | 0.0294(9)  | 2.01 |
| S4   | 0.666667    | 0.333333    | 0.4123(7)   | 0.0333(16) | 1.68 |
| Cl1  | 0           | 0           | 0.3545(7)   | 0.0360(16) | 1.14 |

**$\text{KBa}_4\text{ClGe}_3\text{S}_{10}$**

| Atom | x/a       | y/b       | z/c         | U(eq)      | BVS  |
|------|-----------|-----------|-------------|------------|------|
| K1   | 0         | 0         | 0.3996(17)  | 0.063(4)   | 1.03 |
| Ba1  | 0.3333    | 0.6667    | 0.3357(2)   | 0.0192(7)  | 2.36 |
| Ba2  | 0.6599(2) | 0.7439(2) | 0.6556(2)   | 0.0436(6)  | 1.79 |
| Ge1  | 0.4534(3) | 0.3361(3) | 0.49215(19) | 0.0189(7)  | 4.15 |
| S1   | 0.6692(8) | 0.5474(8) | 0.4292(5)   | 0.0233(16) | 1.98 |
| S2   | 0.3333    | 0.6667    | 0.5927(9)   | 0.025(3)   | 1.8  |
| S3   | 0.2617(9) | 0.3295(9) | 0.4010(6)   | 0.0280(18) | 1.93 |
| S4   | 0.4268(8) | 0.3404(9) | 0.6666(6)   | 0.0304(18) | 1.94 |
| Cl1  | 0         | 0         | 0.6483(13)  | 0.031(3)   | 1.20 |

**Table S3.** Selected distances (Å) and angles (°) for [NaSr<sub>4</sub>Cl][Ge<sub>3</sub>S<sub>10</sub>], [KSr<sub>4</sub>Cl][Ge<sub>3</sub>S<sub>10</sub>], and [KBa<sub>4</sub>Cl][Ge<sub>3</sub>S<sub>10</sub>].

**NaSr<sub>4</sub>ClGe<sub>3</sub>S<sub>10</sub>**

| <b>Atom–Atom</b>      | <b>Length [Å]</b> |                |            |
|-----------------------|-------------------|----------------|------------|
|                       |                   | S2#1-Sr2-S4#5  | 66.90(15)  |
| Sr1-S4#12             | 3.045(6)          | Cl1-Sr2-S3     | 78.2(2)    |
| Sr1-S4#8              | 3.045(6)          | S4-Sr2-S3      | 66.17(14)  |
| Sr1-S3                | 3.057(5)          | S4#5-Sr2-S3    | 117.88(15) |
| Sr1-S3#2              | 3.057(5)          | Cl1-Sr2-S4#1   | 68.92(10)  |
| Ge1-S4                | 2.157(6)          | S4-Sr2-S4#1    | 143.26(17) |
| Ge1-S2                | 2.240(5)          | S4#5-Sr2-S4#1  | 72.98(18)  |
| Sr2-S1                | 2.922(4)          | S1-Sr2-S3      | 71.34(19)  |
| Sr2-S3#11             | 3.134(6)          | S3#15-Sr2-S3   | 162.65(17) |
| Sr2-S2#1              | 3.232(7)          | S2#1-Sr2-S3    | 63.50(14)  |
| Sr2-S3                | 3.493(6)          | S1-Sr2-S4#1    | 142.37(13) |
| S3-Na1                | 2.818(5)          | S3#15-Sr2-S4#1 | 61.22(13)  |
| Sr1-S4#10             | 3.045(6)          | S2#1-Sr2-S4#1  | 65.14(13)  |
| Sr1-S1                | 3.046(10)         | S3-Sr2-S4#1    | 114.26(14) |
| Sr1-S3#3              | 3.057(5)          | S3#4-Na1-Cl1#8 | 89.1(4)    |
| Ge1-S3                | 2.179(5)          | S3#4-Na1-S3    | 119.98(2)  |
| Ge1-S2#4              | 2.245(6)          | S3#4-Na1-Cl1   | 90.9(4)    |
| Sr2-Cl1               | 2.935(3)          | S3#1-Na1-Cl1#8 | 89.1(4)    |
| Sr2-S4                | 3.199(6)          | S3-Na1-Cl1#8   | 89.1(4)    |
| Sr2-S4#3              | 3.331(7)          | S2#1-Sr2-S4#5  | 66.90(15)  |
| Sr2-S4#1              | 3.647(7)          | S3#1-Na1-S3    | 119.98(2)  |
| Na1-Cl1               | 2.910(2)          | Cl1-Na1-Cl1#8  | 180        |
| <b>Atom–Atom–Atom</b> | <b>Angle [°]</b>  | S4#1-Sr2-S4#5  | 72.93(17)  |
| S4-Ge1-S3             | 115.2(2)          | S4-Ge1-S2      | 115.5(2)   |
| S3-Ge1-S2             | 99.6(2)           | S4-Ge1-S2#6    | 110.5(2)   |
| S3-Ge1-S2#6           | 104.8(2)          | S2-Ge1-S2#6    | 110.3(3)   |
| S1-Sr2-Cl1            | 143.70(16)        | S1-Sr2-S3#15   | 123.2(2)   |
| Cl1-Sr2-S3#15         | 84.7(2)           | S1-Sr2-S4      | 74.19(13)  |
| Cl1-Sr2-S4            | 75.71(13)         | S3#15-Sr2-S4   | 106.69(16) |
| S1-Sr2-S2#1           | 88.26(19)         | Cl1-Sr2-S2#1   | 95.6(2)    |
| S3#15-Sr2-S2#1        | 122.04(15)        | S4-Sr2-S2#1    | 129.63(17) |
| S1-Sr2-S4#5           | 72.19(11)         | Cl1-Sr2-S4#5   | 141.89(13) |
| S4-Ge1-S3             | 115.2(2)          | S3#1-Na1-Cl1   | 90.9(4)    |
| S4-Ge1-S2             | 115.5(2)          | S3-Na1-Cl1     | 90.9(4)    |

Symmetry transformations used to generate equivalent atoms:

|                        |                        |                        |                       |
|------------------------|------------------------|------------------------|-----------------------|
| #1 $-y+1, x-y, z$      | #2 $-x+y+1, -x+1, z$   | #3 $-x+y+1, -x+2, z$   | #4 $-x+y+2, -x+2, z$  |
| #5 $-x+1, -y+1, z+1/2$ | #6 $-x+2, -y+1, z+1/2$ | #7 $-x+2, -y+2, z-1/2$ | #8 $y, -x+y, z+1/2$   |
| #9 $y, -x+y+1, z-1/2$  | #10 $y, -x+y+1, z+1/2$ | #11 $x-y, x-1, z+1/2$  | #12 $x-y+1, x, z+1/2$ |

**KSr<sub>4</sub>ClGe<sub>3</sub>S<sub>10</sub>**

| <b>Atom–Atom</b>      | <b>Length [Å]</b> |                 |            |
|-----------------------|-------------------|-----------------|------------|
|                       |                   | S2#16-Sr2-S2    | 165.37(15) |
| Sr1-S2#2              | 3.011(4)          | S2#3-Sr1-S2#6   | 113.30(9)  |
| Sr1-S2                | 3.011(4)          | S2#6-Sr1-S2     | 113.30(9)  |
| Sr1-S1#11             | 3.053(4)          | S2#6-Sr1-S1#15  | 82.95(13)  |
| Sr1-S4                | 3.089(9)          | S2#3-Sr1-S1#14  | 82.95(14)  |
| Ge1-S1                | 2.150(4)          | S2-Sr1-S1#14    | 156.37(14) |
| Ge1-S3                | 2.244(4)          | S2#3-Sr1-S1#10  | 72.07(12)  |
| Sr2-S4                | 2.938(3)          | S2-Sr1-S1#10    | 82.95(14)  |
| Sr2-S2#13             | 3.185(6)          | S1#14-Sr1-S1#10 | 86.31(13)  |
| Sr2-S3#1              | 3.304(5)          | S2#6-Sr1-S4     | 74.70(11)  |
| Sr2-S2                | 3.548(6)          | S1#15-Sr1-S4    | 127.84(9)  |
| K1-S2                 | 2.995(4)          | S1#10-Sr1-S4    | 127.83(9)  |
| K1-S2#1               | 2.995(4)          | S1-Ge1-S3       | 114.70(17) |
| Sr1-S2#2              | 3.011(4)          | S2#3-Sr1-S1#15  | 156.36(14) |
| Sr1-S2#5              | 3.011(4)          | S2-Sr1-S1#15    | 72.07(12)  |
| Sr1-S1#12             | 3.053(4)          | S2#6-Sr1-S1#14  | 72.07(12)  |
| Sr1-S1#8              | 3.053(4)          | S1#15-Sr1-S1#14 | 86.31(13)  |
| Sr1-S2#5              | 3.011(4)          | S2#6-Sr1-S1#10  | 156.37(14) |
| Ge1-S2                | 2.172(4)          | S1#15-Sr1-S1#10 | 86.31(13)  |
| Ge1-S3#4              | 2.251(4)          | S2#3-Sr1-S4     | 74.70(11)  |
| Sr2-Cl1               | 3.015(19)         | S2-Sr1-S4       | 74.70(11)  |
| Sr2-S1                | 3.267(5)          | S1#14-Sr1-S4    | 127.83(9)  |
| Sr2-S1#5              | 3.325(5)          | S1-Ge1-S2       | 114.89(19) |
| K1-Cl1                | 2.952(12)         | S2-Ge1-S3       | 100.12(18) |
| K1-S2#3               | 2.995(4)          | S2-Ge1-S3#5     | 104.70(17) |
| K1-Cl1#6              | 3.016(12)         | S4-Sr2-Cl1      | 143.32(13) |
| <b>Atom–Atom–Atom</b> | <b>Angle [°]</b>  | S1#6-Sr2-S2     | 117.22(11) |
| S1-Ge1-S3#5           | 111.80(17)        | Cl1-Sr2-S2#16   | 85.97(17)  |
| S3-Ge1-S3#5           | 109.6(2)          | Cl1-Sr2-S1      | 75.52(9)   |
| S4-Sr2-S2#16          | 123.32(18)        | S4-Sr2-S3#1     | 89.37(16)  |
| S4-Sr2-S1             | 74.14(10)         | S2#16-Sr2-S3#1  | 119.84(11) |
| S2#16-Sr2-S1          | 108.97(12)        | S4-Sr2-S1#6     | 73.26(9)   |
| Cl1-Sr2-S3#1          | 94.15(15)         | S2#16-Sr2-S1#6  | 76.16(12)  |
| S1-Sr2-S3#1           | 129.27(13)        | S3#1-Sr2-S1#6   | 66.70(11)  |
| Cl1-Sr2-S1#6          | 140.79(10)        | Cl1-Sr2-S2      | 79.75(16)  |
| S1-Sr2-S1#6           | 143.25(14)        | S1-Sr2-S2       | 64.47(10)  |

Symmetry transformations used to generate equivalent atoms:

|     |                   |     |                      |     |                     |     |                     |
|-----|-------------------|-----|----------------------|-----|---------------------|-----|---------------------|
| #1  | $-y, x-y, z$      | #2  | $-y, x-y-1, z$       | #3  | $-y+1, x-y, z$      | #4  | $-x+y, -x, z$       |
| #5  | $-x+y+1, -x, z$   | #6  | $-x+y+1, -x+1, z$    | #7  | $-x, -y, z+1/2$     | #8  | $-x, -y, z-1/2$     |
| #9  | $-x+1, -y, z-1/2$ | #10 | $-x+1, -y, z+1/2$    | #11 | $-x+1, -y+1, z-1/2$ | #12 | $-x+1, -y+1, z+1/2$ |
| #13 | $y, -x+y, z+1/2$  | #14 | $y+1, -x+y+1, z+1/2$ | #15 | $x-y, x, z+1/2$     | #16 | $x-y, x, z-1/2$     |
| #17 | $x-y+1, x, z+1/2$ |     |                      |     |                     |     |                     |

**KBa<sub>4</sub>ClGe<sub>3</sub>S<sub>10</sub>**

|                       |                   |                       |            |
|-----------------------|-------------------|-----------------------|------------|
| <b>Atom–Atom</b>      | <b>Length [Å]</b> | S(4)-Ge(1)-S(1)#1     | 114.4(3)   |
| Ge(1)-S(4)            | 2.149(8)          | S(3)-Ge(1)-S(1)#1     | 101.9(3)   |
| Ge(1)-S(3)            | 2.176(7)          | S(1)-Ge(1)-S(1)#1     | 108.3(4)   |
| Ge(1)-S(1)            | 2.254(8)          | S(3)-K(1)-Cl(1)       | 89.7(4)    |
| Ge(1)-S(1)#1          | 2.257(7)          | S(3)#8-K(1)-Cl(1)     | 89.7(4)    |
| S(1)-Ba(2)#2          | 3.410(7)          | S(3)#6-K(1)-Cl(1)     | 89.7(4)    |
| S(2)-Ba(2)#3          | 3.032(4)          | S(3)-K(1)-Cl(1)#5     | 90.3(4)    |
| S(2)-Ba(2)            | 3.032(4)          | S(3)#8-K(1)-Cl(1)#5   | 90.3(4)    |
| S(2)-Ba(2)#4          | 3.032(4)          | S(3)#6-K(1)-Cl(1)#5   | 90.3(4)    |
| S(2)-Ba(1)            | 3.137(11)         | Cl(1)-K(1)-Cl(1)#5    | 180.0      |
| S(3)-K(1)             | 2.991(8)          | S(2)-Ba(1)-S(3)#14    | 75.37(15)  |
| S(3)-Ba(1)#2          | 3.155(8)          | S(2)-Ba(1)-S(3)#8     | 75.37(15)  |
| S(3)-Ba(2)#5          | 3.266(8)          | S(3)#14-Ba(1)-S(3)#8  | 113.85(12) |
| S(3)-Ba(2)#6          | 3.601(8)          | S(2)-Ba(1)-S(3)#15    | 75.37(15)  |
| S(4)-Ba(1)#7          | 3.178(7)          | S(3)#14-Ba(1)-S(3)#15 | 113.85(12) |
| S(4)-Ba(2)#6          | 3.403(7)          | S(3)#8-Ba(1)-S(3)#15  | 113.85(12) |
| S(4)-Ba(2)#2          | 3.483(8)          | S(2)-Ba(1)-S(4)#16    | 130.51(14) |
| S(4)-Ba(2)#8          | 3.673(8)          | S(3)#14-Ba(1)-S(4)#16 | 85.1(2)    |
| K(1)-Cl(1)            | 3.03(3)           | S(3)#8-Ba(1)-S(4)#16  | 152.6(2)   |
| K(1)-Cl(1)#5          | 3.07(3)           | S(3)#15-Ba(1)-S(4)#16 | 71.90(19)  |
| K(1)-Ba(2)#9          | 4.259(15)         | S(2)-Ba(1)-S(4)#17    | 130.51(14) |
| K(1)-Ba(2)#10         | 4.259(15)         | S(3)#14-Ba(1)-S(4)#17 | 71.90(19)  |
| K(1)-Ba(2)#5          | 4.259(15)         | S(3)#8-Ba(1)-S(4)#17  | 85.1(2)    |
| K(1)-Ba(2)            | 4.363(15)         | S(3)#15-Ba(1)-S(4)#17 | 152.6(2)   |
| K(1)-Ba(2)#6          | 4.363(15)         | S(4)#16-Ba(1)-S(4)#17 | 82.4(2)    |
| K(1)-Ba(2)#8          | 4.363(15)         | S(2)-Ba(1)-S(4)#5     | 130.51(14) |
| Ba(1)-Ba(2)#11        | 4.659(2)          | S(3)#14-Ba(1)-S(4)#5  | 152.6(2)   |
| Ba(1)-Ba(2)#10        | 4.659(2)          | S(3)#8-Ba(1)-S(4)#5   | 71.90(19)  |
| Ba(1)-Ba(2)#12        | 4.659(2)          | S(3)#15-Ba(1)-S(4)#5  | 85.1(2)    |
| Cl(1)-Ba(2)           | 3.046(2)          | S(4)#16-Ba(1)-S(4)#5  | 82.4(2)    |
| Cl(1)-Ba(2)#6         | 3.046(2)          | S(4)#17-Ba(1)-S(4)#5  | 82.4(2)    |
| Cl(1)-Ba(2)#8         | 3.046(2)          | S(2)-Ba(2)-Cl(1)      | 143.27(17) |
| <b>Atom–Atom–Atom</b> | <b>Angle [°]</b>  | S(3)-K(1)-S(3)#8      | 119.997(9) |
| S(4)-Ge(1)-S(3)       | 113.1(3)          | S(3)-K(1)-S(3)#6      | 119.996(9) |
| S(4)-Ge(1)-S(1)       | 112.8(3)          | S(3)#8-K(1)-S(3)#6    | 119.997(9) |
| S(3)-Ge(1)-S(1)       | 105.2(3)          | S(4)-Ge(1)-S(1)#1     | 114.4(3)   |



|                       |            |                      |            |
|-----------------------|------------|----------------------|------------|
| S(2)-Ba(2)-S(3)#7     | 121.3(2)   | Cl(1)-Ba(2)-S(1)#15  | 96.8(3)    |
| Cl(1)-Ba(2)-S(3)#7    | 85.7(3)    | S(3)#7-Ba(2)-S(1)#15 | 122.55(18) |
| S(2)-Ba(2)-S(4)#8     | 74.20(14)  | S(4)#8-Ba(2)-S(1)#15 | 128.07(19) |
| Cl(1)-Ba(2)-S(4)#8    | 73.84(14)  | S(2)-Ba(2)-S(4)#15   | 73.00(13)  |
| S(3)#7-Ba(2)-S(4)#8   | 107.81(19) | Cl(1)-Ba(2)-S(4)#15  | 141.45(13) |
| S(2)-Ba(2)-S(1)#15    | 88.9(2)    | S(3)#7-Ba(2)-S(4)#15 | 78.69(19)  |
| S(4)#8-Ba(2)-S(4)#15  | 144.5(2)   | S(4)#15-Ba(2)-S(3)#8 | 117.37(18) |
| S(1)#15-Ba(2)-S(4)#15 | 64.30(18)  | S(2)-Ba(2)-S(4)#6    | 141.74(14) |
| S(2)-Ba(2)-S(3)#8     | 70.3(2)    | Cl(1)-Ba(2)-S(4)#6   | 69.93(12)  |
| Cl(1)-Ba(2)-S(3)#8    | 79.0(3)    | S(3)#7-Ba(2)-S(4)#6  | 64.48(18)  |
| S(3)#7-Ba(2)-S(3)#8   | 163.5(2)   | S(4)#8-Ba(2)-S(4)#6  | 143.35(19) |
| S(4)#8-Ba(2)-S(3)#8   | 61.96(18)  | S(1)#15-Ba(2)-S(4)#6 | 62.95(17)  |
| S(1)#15-Ba(2)-S(3)#8  | 66.11(16)  | S(4)#15-Ba(2)-S(4)#6 | 71.5(2)    |

Symmetry transformations used to generate equivalent atoms:

|                          |                          |                       |                          |
|--------------------------|--------------------------|-----------------------|--------------------------|
| #1 $x-1, y-1, z+1$       | #2 $x+1, y+1, z-1$       | #3 $-y, x-y-1, z$     | #4 $-y+1, x-y-1, z$      |
| #5 $-y+1, x-y, z-1$      | #6 $-y+2, x-y, z$        | #7 $-x+y+1, -x, z$    | #8 $-x+y+2, -x+1, z-1$   |
| #9 $-x+y+2, -x+1, z$     | #10 $-x+y+2, -x+2, z-1$  | #11 $-x+2, -y, z-1/2$ | #12 $-x+2, -y, z-1/2$    |
| #13 $-x+2, -y+1, z-1/2$  | #14 $-x+2, -y+1, z+1/2$  | #15 $y, -x+y, z+1/2$  | #16 $y+1, -x+y+1, z-1/2$ |
| #17 $y+1, -x+y+1, z+1/2$ | #18 $y+2, -x+y+2, z-1/2$ | #19 $x-y, x-1, z+1/2$ | #20 $x-y, x, z-1/2$      |
| #21 $x-y+1, x, z-1/2$    |                          |                       |                          |

**Table S4.** Dimensional distribution and arrangement pattern of  $[M_xQ_y]$  units.

| Compound                                                                      | Anionic groups                                                 | Anionic group dimensions | $(M + N)/Q^{[b]}$ | Law of dimensions          | Ref.             |
|-------------------------------------------------------------------------------|----------------------------------------------------------------|--------------------------|-------------------|----------------------------|------------------|
| $[\text{Rb}_4\text{Cl}][\text{Cd}_{11}\text{In}_9\text{S}_{26}]$              | $\text{CdIn}_3\text{S}_{10}$ ,<br>$\text{Cd}_3\text{InS}_{10}$ | 3D                       | 0.77              |                            | 1                |
| $[\text{K}_4\text{Cl}][\text{CdGa}_9\text{Q}_{16}]$<br>(Q = S, Se)            | $\text{Ga}_4\text{S}_{10}$ ,<br>$\text{Ga}_3\text{CdS}_{10}$   | 3D                       | 0.625             |                            | 2                |
| $\text{Ba}_3\text{AGa}_5\text{Se}_{10}\text{Cl}_2$<br>(A = Cs, Rb, K)         | $\text{GaSe}_4$ ,<br>$\text{Ga}_4\text{Se}_{10}$               | 3D                       | 0.5               |                            | 3                |
| $\text{Ba}_4\text{MGA}_4\text{Se}_{10}\text{Cl}_2$ (M =<br>Zn, Cd, Mn, Cu/Ga) | $\text{MSe}_4$ ,<br>$\text{Ga}_4\text{Se}_{10}$                | 3D                       | 0.5               |                            | 4                |
| $\text{Li}_2\text{Cs}_2\text{Ga}_3\text{S}_6\text{Cl}$                        | $\text{Ga}_3\text{S}_9$                                        | 3D                       | 0.5               | $(M + N)/Q$<br>$\geq 0.5$  | 5                |
| $\text{Cs}_2[\text{Mn}_2\text{Ga}_3\text{S}_7\text{Cl}]$                      | $\text{Ga}_3\text{S}_9$<br>$\text{MnS}_6$                      | 2D                       | 0.71              |                            | 6                |
| $\text{ABa}_2\text{Ga}_4\text{S}_8\text{Cl}$ (A = Rb,<br>Cs)                  | $\text{Ga}_4\text{S}_{10}$                                     | 2D                       | 0.5               |                            | 7                |
| $[\text{ABr}][\text{Hg}_3\text{P}_2\text{S}_8]$ (A =<br>Rb, Cs; X = Cl, Br)   | $\text{HgS}_4$ ,<br>$\text{HgPS}_4$                            | 2D                       | 0.625             |                            | 8, 10            |
| $[\text{A}_3\text{X}][\text{Ga}_3\text{PS}_8]$ (A = K,<br>Rb; X = Cl, Br)     | $\text{GaPS}_4$<br>$\text{Ga}_3\text{PS}_{10}$                 | 2D                       | 0.5               |                            | 9, 10            |
| $\text{NaGaS}_2\text{Cl}$                                                     | $\text{Ga}_4\text{Se}_{10}$                                    | 2D                       | 0.5               |                            | 11               |
| $\text{Ba}_7\text{In}_2\text{Se}_6\text{F}_8$                                 | $\text{InS}_4$                                                 | 1D                       | 0.3               |                            | 12               |
| $\text{Ba}_3\text{GaS}_4\text{Cl}$                                            | $\text{GaS}_4$                                                 | 0D                       | 0.25              |                            |                  |
| $\text{K}_2\text{Ba}_3\text{Ge}_3\text{S}_9\text{Cl}_2$                       | $\text{Ge}_3\text{S}_9$                                        | 0D                       | 0.3               |                            | 13               |
| $\text{Ba}_3\text{SnS}_3\text{F}_2$                                           | $\text{SnS}_4$                                                 | 0D                       | 0.33              | $(M + N)/Q$<br>$\leq 0.33$ | 14               |
| <b><math>\text{NaSr}_4\text{ClGe}_3\text{S}_{10}</math></b>                   | <b><math>\text{Ge}_3\text{S}_9</math></b>                      | <b>0D</b>                | <b>0.3</b>        |                            |                  |
| <b><math>\text{KSr}_4\text{ClGe}_3\text{S}_{10}</math></b>                    | <b><math>\text{Ge}_3\text{S}_9</math></b>                      | <b>0D</b>                | <b>0.3</b>        |                            | <b>This work</b> |
| <b><math>\text{KBa}_4\text{ClGe}_3\text{S}_{10}</math></b>                    | <b><math>\text{Ge}_3\text{S}_9</math></b>                      | <b>0D</b>                | <b>0.3</b>        |                            |                  |

<sup>[b]</sup> M = IIIA or IVA, N = IB or IIB or cations coordinated as  $[M_xQ_y]$  anionic groups.

**Table S5.** Magnitude of Dipole Moments of  $[\text{NaSr}_4\text{Cl}][\text{Ge}_3\text{S}_{10}]$ ,  $[\text{KSr}_4\text{Cl}][\text{Ge}_3\text{S}_{10}]$ , and  $[\text{KBa}_4\text{Cl}][\text{Ge}_3\text{S}_{10}]$ .

| Crystals                                  | Polyhedron               | $x(a)$ | $y(b)$ | $z(c)$ | Dipole moment (D) | Dipole moment ( $\times 10^{-2}$ esu $\cdot\text{cm}^2/\text{\AA}^3$ ) |
|-------------------------------------------|--------------------------|--------|--------|--------|-------------------|------------------------------------------------------------------------|
| $\text{NaSr}_4\text{ClGe}_3\text{S}_{10}$ | $\text{Ge}(1)\text{S}_4$ | 0.14   | -1.48  | -4.14  | 4.42              | 2.66                                                                   |
|                                           | $\text{Ge}(1)\text{S}_4$ | -1.62  | -0.14  | -4.14  | 4.42              |                                                                        |
|                                           | $\text{Ge}(1)\text{S}_4$ | 1.48   | 1.62   | -4.14  | 4.42              |                                                                        |
|                                           | $\text{Ge}_3\text{S}_9$  | 0      | 0      | -12.43 | 12.43             |                                                                        |
| $\text{KSr}_4\text{ClGe}_3\text{S}_{10}$  | $\text{Ge}(1)\text{S}_4$ | 0.47   | -1.34  | 4.13   | 4.44              | 2.54                                                                   |
|                                           | $\text{Ge}(1)\text{S}_4$ | 1.34   | 1.83   | 4.13   | 4.44              |                                                                        |
|                                           | $\text{Ge}(1)\text{S}_4$ | -1.83  | -0.47  | 4.13   | 4.44              |                                                                        |
|                                           | $\text{Ge}_3\text{S}_9$  | 0      | 0      | 12.39  | 12.39             |                                                                        |
| $\text{KBa}_4\text{ClGe}_3\text{S}_{10}$  | $\text{Ge}(1)\text{S}_4$ | 0.54   | -1.36  | -3.55  | 3.94              | 2.05                                                                   |
|                                           | $\text{Ge}(1)\text{S}_4$ | 1.36   | 1.90   | -3.55  | 3.94              |                                                                        |
|                                           | $\text{Ge}(1)\text{S}_4$ | -1.90  | -0.54  | -3.55  | 3.94              |                                                                        |
|                                           | $\text{Ge}_3\text{S}_9$  | 0      | 0      | -10.65 | 10.65             |                                                                        |

**Fig. S1.** Powder-XRD patterns of (a)  $[\text{NaSr}_4\text{Cl}][\text{Ge}_3\text{S}_{10}]$ , (b)  $[\text{KSr}_4\text{Cl}][\text{Ge}_3\text{S}_{10}]$ , and (c)  $[\text{KBa}_4\text{Cl}][\text{Ge}_3\text{S}_{10}]$  from 650°C to 850°C.

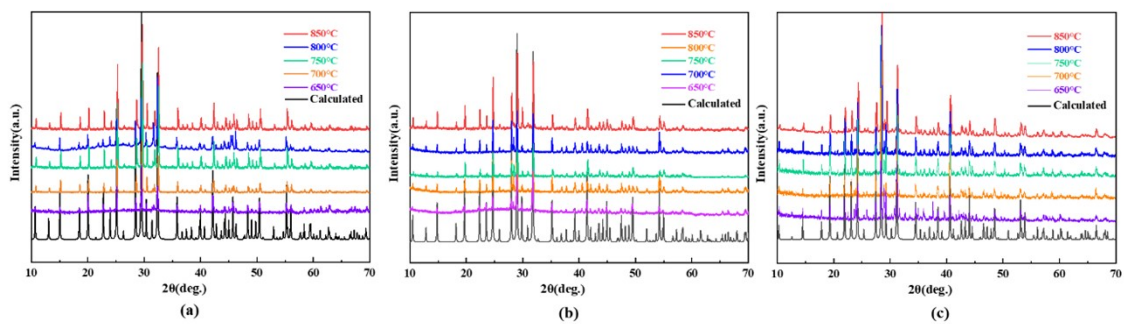

**Fig. S2.** EDS of (a)  $[\text{NaSr}_4\text{Cl}][\text{Ge}_3\text{S}_{10}]$ , (b)  $[\text{KSr}_4\text{Cl}][\text{Ge}_3\text{S}_{10}]$ , (c) and  $[\text{KBa}_4\text{Cl}][\text{Ge}_3\text{S}_{10}]$ .

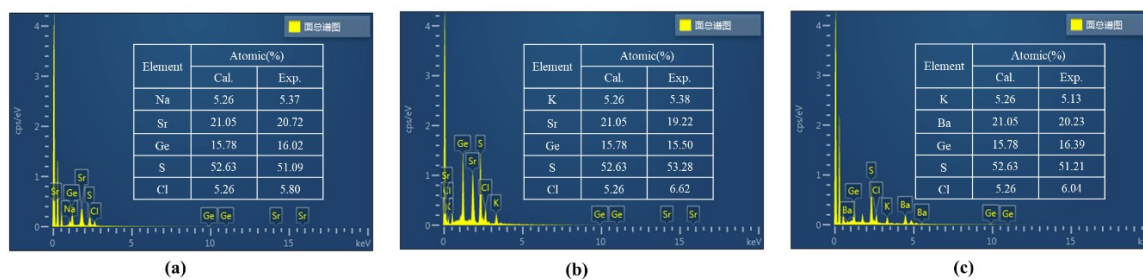

**Fig. S3.** IR spectra of (a)  $[\text{NaSr}_4\text{Cl}][\text{Ge}_3\text{S}_{10}]$ , (b)  $[\text{KSr}_4\text{Cl}][\text{Ge}_3\text{S}_{10}]$ , and (c)  $[\text{KBa}_4\text{Cl}][\text{Ge}_3\text{S}_{10}]$ . (IR samples were polycrystalline samples that synthesized by high temperature solid phase method in 1123 K)

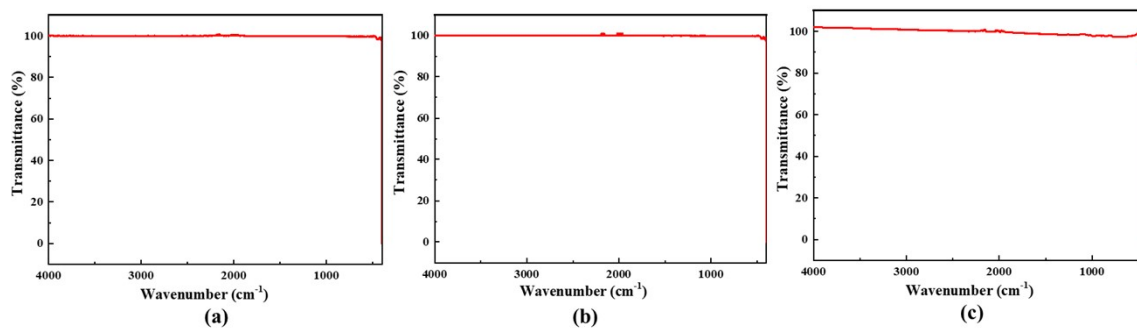

Fig. S4. Complete coordination environment of cations in  $[\text{NaSr}_4\text{Cl}][\text{Ge}_3\text{S}_{10}]$ .

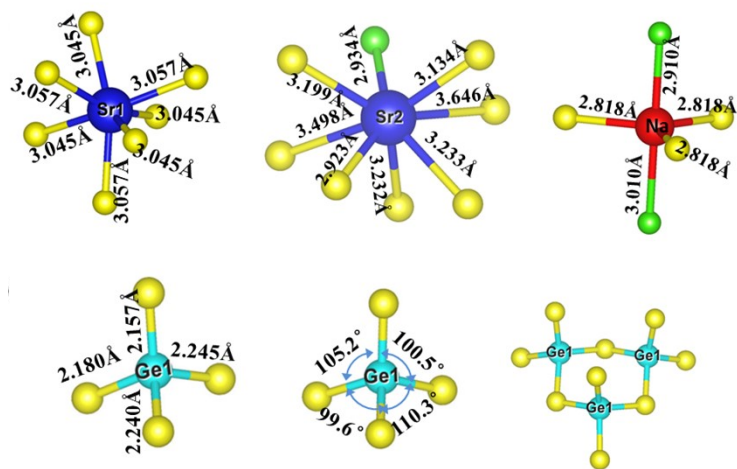

**Fig. S5.** Raman spectra of (a)  $[\text{NaSr}_4\text{Cl}][\text{Ge}_3\text{S}_{10}]$ , (b)  $[\text{KSr}_4\text{Cl}][\text{Ge}_3\text{S}_{10}]$ , and (c)  $[\text{KBa}_4\text{Cl}][\text{Ge}_3\text{S}_{10}]$ .

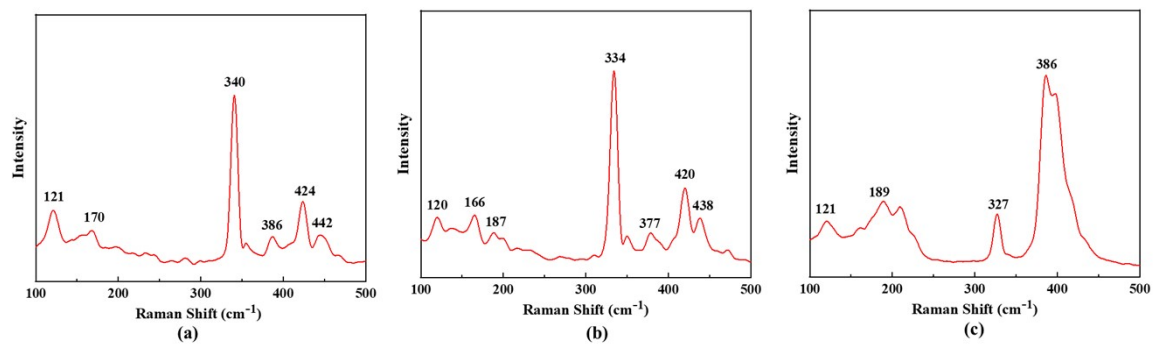



**Fig. S6.** Crystal for the birefringence determination and the interference colors observed in the cross-polarized light for (a)  $[\text{NaSr}_4\text{Cl}][\text{Ge}_3\text{S}_{10}]$ , (b)  $[\text{KSr}_4\text{Cl}][\text{Ge}_3\text{S}_{10}]$ , and (c)  $[\text{KBa}_4\text{Cl}][\text{Ge}_3\text{S}_{10}]$ ; the crystal thicknesses for (d)  $[\text{NaSr}_4\text{Cl}][\text{Ge}_3\text{S}_{10}]$ , (e)  $[\text{KSr}_4\text{Cl}][\text{Ge}_3\text{S}_{10}]$ , and (f)  $[\text{KBa}_4\text{Cl}][\text{Ge}_3\text{S}_{10}]$ .

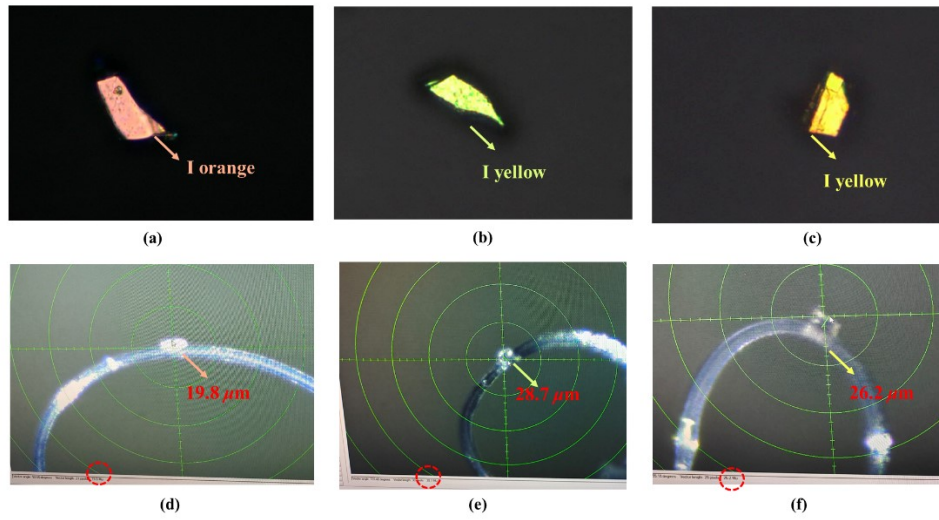

**Fig. S7.** Calculated birefringence ( $\Delta n$ ) curves of (a)  $[\text{NaSr}_4\text{Cl}][\text{Ge}_3\text{S}_{10}]$ , (b)  $[\text{KSr}_4\text{Cl}][\text{Ge}_3\text{S}_{10}]$ , and (c)  $[\text{KBa}_4\text{Cl}][\text{Ge}_3\text{S}_{10}]$ .

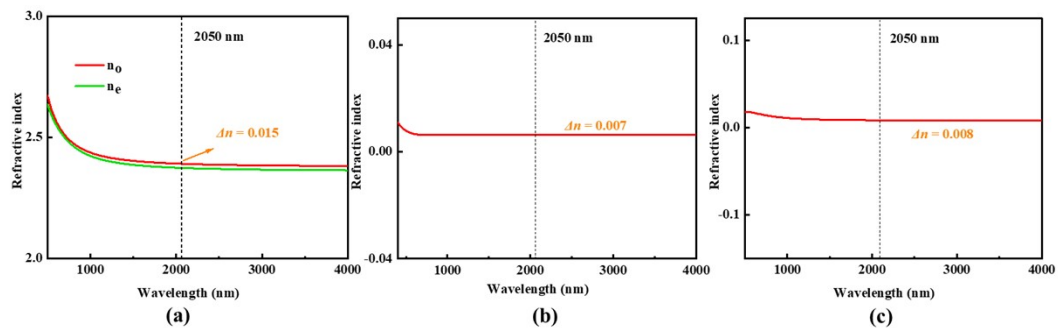

**Fig. S8.** Calculated band structure of (a)  $[\text{NaSr}_4\text{Cl}][\text{Ge}_3\text{S}_{10}]$ , (b)  $[\text{KSr}_4\text{Cl}][\text{Ge}_3\text{S}_{10}]$ , and (c)  $[\text{KBa}_4\text{Cl}][\text{Ge}_3\text{S}_{10}]$ .

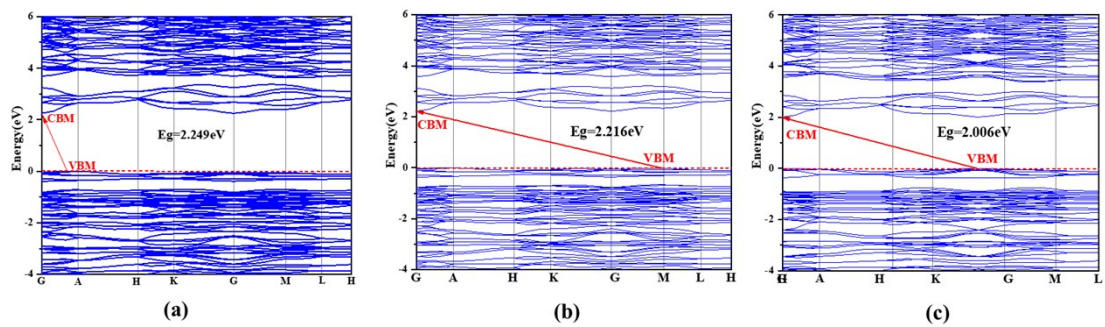

**Fig. S9.** Projected density of states of (a)  $[\text{NaSr}_4\text{Cl}][\text{Ge}_3\text{S}_{10}]$ , (b)  $[\text{KSr}_4\text{Cl}][\text{Ge}_3\text{S}_{10}]$ , and (c)  $[\text{KBa}_4\text{Cl}][\text{Ge}_3\text{S}_{10}]$ .

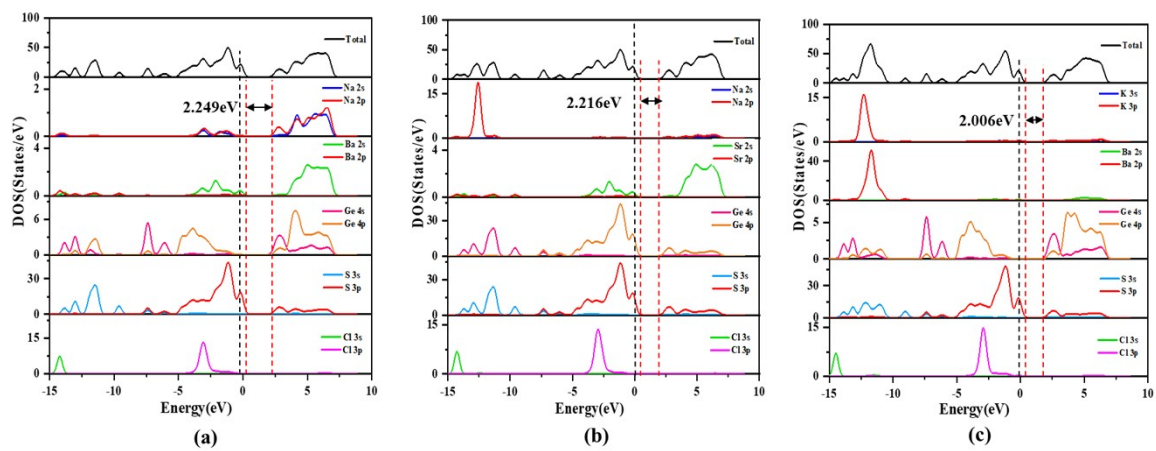

## References

1. S.-M. Pei, L.-T. Jiang, B.-W. Liu, G.-C. Guo, A new salt-inclusion chalcogenide exhibiting distinctive  $[\text{Cd}_{11}\text{In}_9\text{S}_{26}]^{3-}$  host framework and decent nonlinear optical performances, *J. Alloys Compd.* 2022, **902**, 163656.
2. S.-M. Pei, B.-W. Liu, X.-M. Jiang, Y.-Q. Zou, W.-F. Chen, Q.-N. Yan, G.-C. Guo, Superior Infrared Nonlinear Optical Performance Achieved by Synergetic Functional Motif and Vacancy Site Modulations, *Chem. Mater.* 2021, **33**, 8831-8837.
3. P. Yu, L.J. Zhou, L. Chen,  $\text{Ba}_3\text{AGa}_5\text{Se}_{10}\text{Cl}_2$  (A = Cs, Rb, K) Noncentrosymmetric inorganic open-framework chalcogenides with strong middle IR SHG and red emission:  $\text{Ba}_3\text{AGa}_5\text{Se}_{10}\text{Cl}_2$  (A = Cs, Rb, K), *J. Am. Chem. Soc.* 2012, **134**, 2227-2235.
4. Y.-Y. Li, P.-F. Liu, L. Hu, L. Chen, H. Lin, L.-J. Zhou, L.-M. Wu, Strong IR NLO Material  $\text{Ba}_4\text{MGa}_4\text{Se}_{10}\text{Cl}_2$ : Highly Improved Laser Damage Threshold via Dual Ion Substitution Synergy, *Adv. Opt. Mater.* 2015, **3**, 957-966.
5. B.W. Liu, X.M. Jiang, B.X. Li, H.Y. Zeng, G.C. Guo,  $\text{Li}[\text{LiCs}_2\text{Cl}][\text{Ga}_3\text{S}_6]$ : A Nanoporous Framework of  $\text{GaS}_4$  Tetrahedra with Excellent Nonlinear Optical Performance, *Angew. Chem. Int. Ed.* 2020, **59**, 4856-4859.
6. Y.J. Zheng, Y.F. Shi, C.B. Tian, H. Lin, L.M. Wu, X.T. Wu, Q.L. Zhu, An unprecedented pentanary chalcogenide with Mn atoms in two chemical environments: unique bonding characteristics and magnetic properties, *Chem. Commun.* 2018, **55**, 79-82.
7. B. W. Liu, X. M. Jiang, H. Y. Zeng and G. C. Guo,  $[\text{ABa}_2\text{Cl}][\text{Ga}_4\text{S}_8]$  (A = Rb, Cs): Wide-Spectrum Nonlinear Optical Materials Obtained by Polycation-Substitution-Induced Nonlinear Optical (NLO)-Functional Motif Ordering, *J. Am. Chem. Soc.* 2020, **142**, 10641-10645.
8. W. Xing, C. Tang, N. Wang, C. Li, E. Uykur, J. Wu, Z. Lin, J. Yao, W. Yin and B. Kang,  $\text{AXHg}_3\text{P}_2\text{S}_8$  (A = Rb, Cs; X = Cl, Br): New Excellent Infrared Nonlinear Optical Materials with Mixed-Anion Chalcogenide Groups of Trigonal Planar  $[\text{HgS}_2\text{X}]^{3-}$  and Tetrahedral  $[\text{HgS}_3\text{X}]^{5-}$ , *Adv. Opt. Mater.* 2021, **9**, 2100563.
9. B. W. Liu, H. Y. Zeng, X. M. Jiang, G. E. Wang, S. F. Li, L. Xu and G. C. Guo,  $[\text{A}_3\text{X}][\text{Ga}_3\text{PS}_8]$  (A = K, Rb; X = Cl, Br): promising IR non-linear optical materials exhibiting concurrently strong second-harmonic generation and high laser induced damage thresholds, *Chem. Sci.* 2016, **7**, 6273-6277.
10. Q. G. Yue, W. B. Wei, H. Chen, X. T. Wu, H. Lin and Q. L. Zhu, Salt-inclusion chalcogenides: an emerging class of IR nonlinear optical materials, *Dalton Trans.* 2020, **49**, 14338-14343.
11. X. Li, F. Liang, T. Liu and H. Li,  $\text{Na}_2\text{GaS}_2\text{Cl}$ : a new sodium-rich chalcogenide with two-dimensional  $[\text{GaS}_2]$  infinity layers and wide interlayer space, *Dalton Trans.* 2021, **50**, 11167-11172.
12. K. Feng, W. Yin, Z. Lin, J. Yao, Y. Wu, Five new chalcogenides,  $\text{Ba}_3\text{GaS}_4\text{X}$  (X = Cl, Br),  $\text{Ba}_3\text{MSe}_4\text{Cl}$  (M = Ga, In), and  $\text{Ba}_7\text{In}_2\text{Se}_6\text{F}_8$ : syntheses, crystal structures, and optical properties, *Inorg. Chem.* 2013, **55**, 11503-11508.
13. W. Zhou, Z.-H. Shi, W. Liu, S.-P. Guo, Noncentrosymmetric chalcogenide  $\text{K}_2\text{Ba}_3\text{Ge}_3\text{S}_9\text{Cl}_2$ : A new nonlinear optical material with remarkable laser-induced damage threshold, *J. Alloys Compd.* 2022, **895**, 162602.
14. H. Kabbour, L. Cario, M. Danot, A. Meerschaut, Design of a new family of inorganic compounds  $\text{Ae}_2\text{F}_2\text{SnX}_3$  (Ae= Sr, Ba; X= S, Se) using rock salt and fluorite 2D building blocks, *Inorg. Chem.* 2006, **45**, 917-922.
